# Supplementary material for: Gunshot Wounds of an Abdomen- a Single-Institution Experience
Source: Preprints.org preprint supplement (doi:10.20944/preprints202307.1447.v1), 2023-07-21

Figure 1. 1a and 1b. Multiple injuries of the mesocolon transversum and mesentery of the small intestine, 1c. rupture of D3 duodenal portion, 1d. laceration of v cava inferior and right v. iliaca communis. 1e. the primary suture of the duodenum, 1f. Two drains were placed, the first one in the right paracolic, and the second one in the recto-vesical space

**1a. 1b. 1c.**


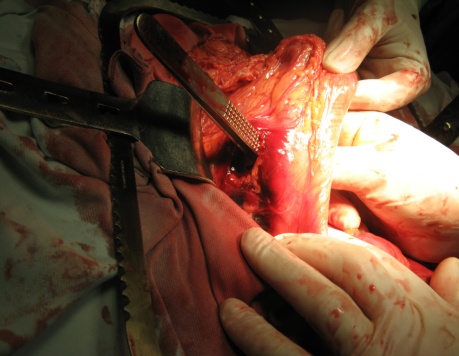

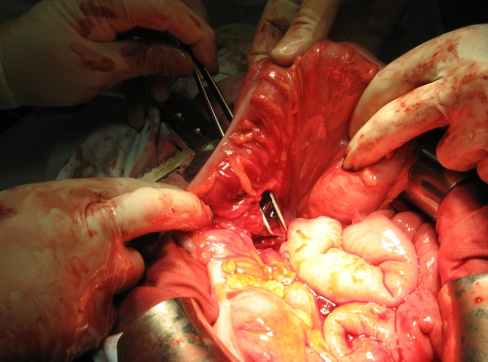

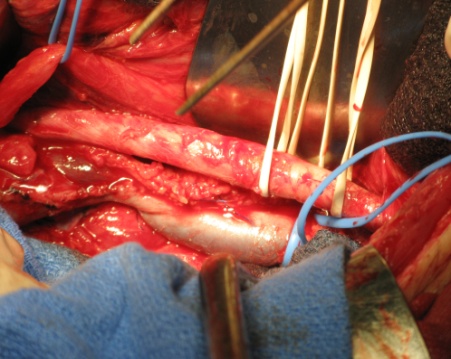


**1d. 1e. 1f.**


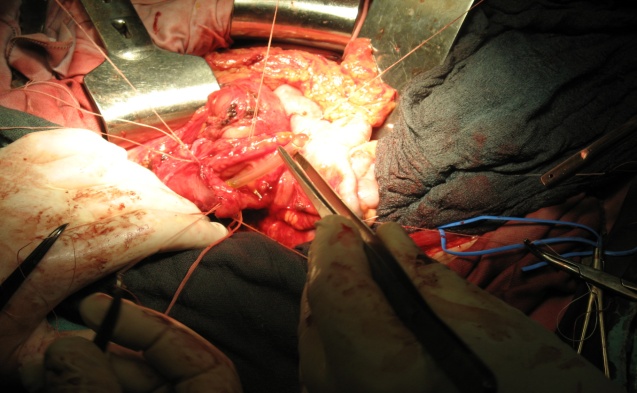

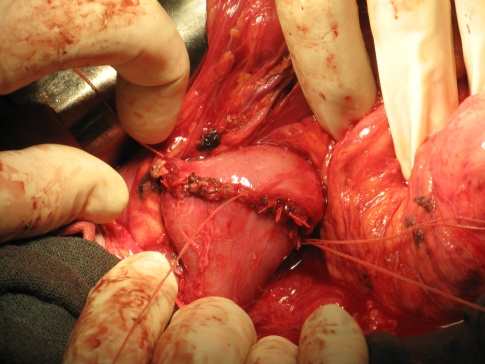

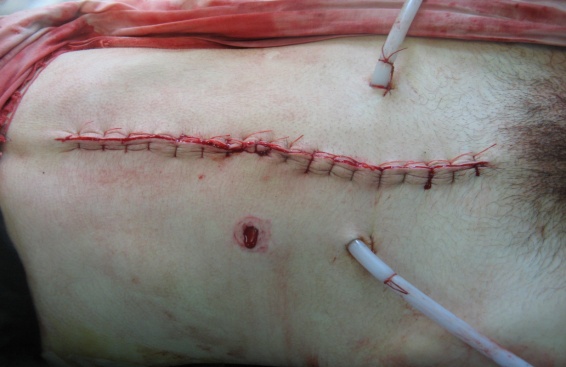


Figure 2. 2a.Patient with an entry wound in the epigastric area left of the xiphoid, and an exit wound in the left paravertebral area, 2b. conquassation of the spleen with transsection of the splenic vein and artery, 2c. lesion of the left kidney with transection of the renal vein and artery, 2d. primary stomach suture

2a, 2b.


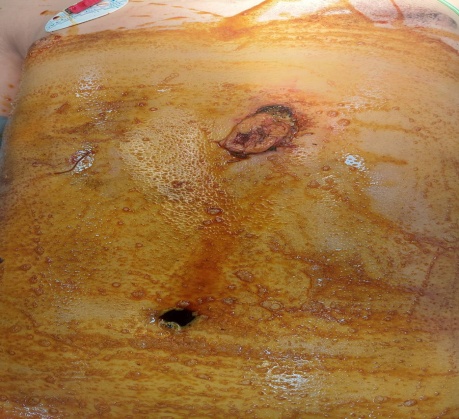

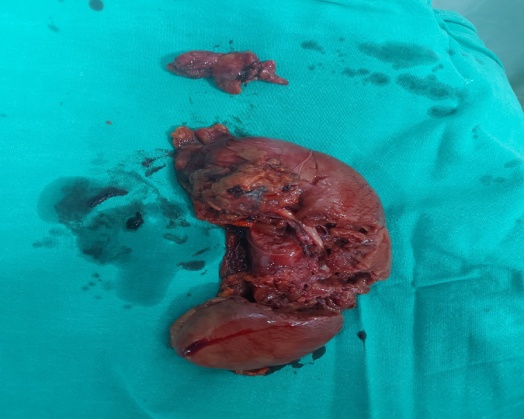


2c. 2d.


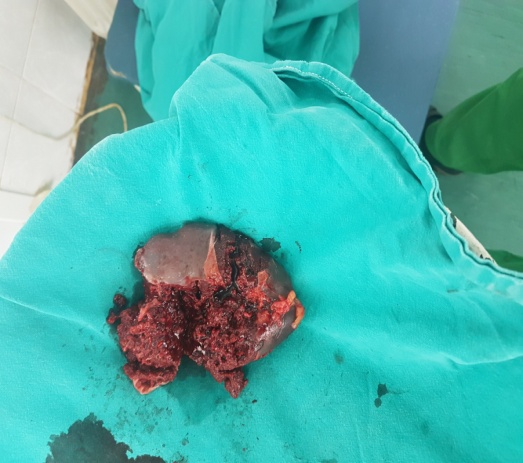

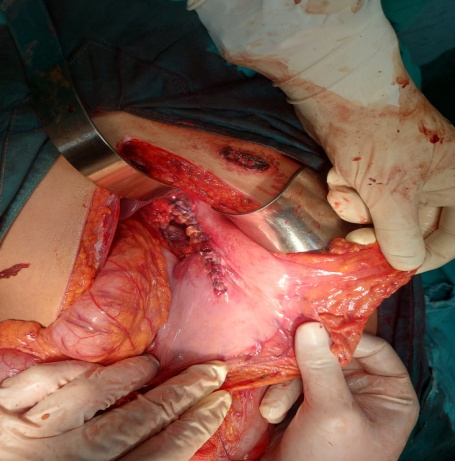

Supplement: Supplementary file 1 [file supplementary]
